# Supplementary material
Source: PubMed Central journal article supplement (PMC8848877)
Supplement: JGMED21002841.pdf [file JGMED21002841.pdf]

# 3-Year Pathway Student Survey (2019)

---

## Start of Block: Default Question Block

Q63 We are asking all of the three-year pathway graduating students to complete the following survey which will provide us with important information so that we can know what worked and what didn't and continuously improve this important program.

Please answer all the questions as openly and honestly as you can - we need real feedback. The survey is being administered by the Division of Education Quality so that you can rest assured that your responses will be kept strictly confidential. For example, I will never see any individual responses nor will anyone else involved in the 3 year pathway (or medical school or residency programs) - just a summary, aggregate report.

We are very proud of your accomplishments and look forward to celebrating your graduation next week! We know you'll have a successful transition to residency (in fact, we will be reaching out to you to check back in periodically to see how things are going).

Thanks,  
Joan

---

Q1 Did you have a gap between college and medical school ?

No

Yes

---

*Display This Question:*

*If Did you have a gap between college and medical school ? = Yes*

Q2 If yes, how many years ? (enter number of years)

---

Cangiarella J, Elias K, Kalet A, Cohen E, Abramson S, Gillespie C. A preliminary evaluation of students' learning and performance outcomes in an accelerated 3-Year MD pathway program. *J Grad Med Educ.* 2022;14(1):99-107. doi:10.4300/JGME-D-21-00284.1

*Display This Question:*

*If Did you have a gap between college and medical school ? = Yes*

Q50 What did you do during that gap period? (Please select all that apply and then describe each)

Pursued a different career (enter field)

---

Performed research (please describe)

---

Had other life experience (please describe)

---

*Display This Question:*

*If Did you have a gap between college and medical school ? = Yes*

Q3 When did you first hear about our three-year MD pathway ?

Prior to application to NYUSOM

During interview day

During revisit day

After initial acceptance to four year program

---

Q4 When did you make your decision to pursue your medical specialty ?

Prior to college

During college

After college

---

Cangiarella J, Elias K, Kalet A, Cohen E, Abramson S, Gillespie C. A preliminary evaluation of students' learning and performance outcomes in an accelerated 3-Year MD pathway program. *J Grad Med Educ.* 2022;14(1):99-107. doi:10.4300/JGME-D-21-00284.1

Q58 Please rate the importance of the following factors in your choice to do the three-year pathway.

|                                                            | Not at All Important  | A Little Bit Important | Moderately Important  | Very Important        |
|------------------------------------------------------------|-----------------------|------------------------|-----------------------|-----------------------|
| financial factors                                          | <input type="radio"/> | <input type="radio"/>  | <input type="radio"/> | <input type="radio"/> |
| increased faculty support and mentoring within the program | <input type="radio"/> | <input type="radio"/>  | <input type="radio"/> | <input type="radio"/> |
| starting your career one year early                        | <input type="radio"/> | <input type="radio"/>  | <input type="radio"/> | <input type="radio"/> |
| acceptance into residency                                  | <input type="radio"/> | <input type="radio"/>  | <input type="radio"/> | <input type="radio"/> |

---

Q59 Please tell us, in your own words, why you chose the three-year pathway:

---

---

---

---

---

Cangiarella J, Eliasz K, Kalet A, Cohen E, Abramson S, Gillespie C. A preliminary evaluation of students' learning and performance outcomes in an accelerated 3-Year MD pathway program. *J Grad Med Educ.* 2022;14(1):99-107. doi:10.4300/JGME-D-21-00284.1

Q78 Would you recommend the Three-Year Pathway to other medical students?

- Would NOT recommend
  - Would recommend with reservations
  - Would recommend
  - Would HIGHLY recommend
-

Cangiarella J, Elias K, Kalet A, Cohen E, Abramson S, Gillespie C. A preliminary evaluation of students' learning and performance outcomes in an accelerated 3-Year MD pathway program. *J Grad Med Educ.* 2022;14(1):99-107. doi:10.4300/JGME-D-21-00284.1

Q6 Please rate how valuable you found the following student support and program components:

|                                                             | Not at All Valuable   | Only a Little Bit Valuable | Somewhat Valuable     | Very Valuable         | Not Applicable        |
|-------------------------------------------------------------|-----------------------|----------------------------|-----------------------|-----------------------|-----------------------|
| Summer program before first year (if applicable)            | <input type="radio"/> | <input type="radio"/>      | <input type="radio"/> | <input type="radio"/> | <input type="radio"/> |
| 8 week summer program between first and second year         | <input type="radio"/> | <input type="radio"/>      | <input type="radio"/> | <input type="radio"/> | <input type="radio"/> |
| Student liaisons                                            | <input type="radio"/> | <input type="radio"/>      | <input type="radio"/> | <input type="radio"/> | <input type="radio"/> |
| Intensive mentoring                                         | <input type="radio"/> | <input type="radio"/>      | <input type="radio"/> | <input type="radio"/> | <input type="radio"/> |
| 3 YPP specific elective(s)                                  | <input type="radio"/> | <input type="radio"/>      | <input type="radio"/> | <input type="radio"/> | <input type="radio"/> |
| Connection to residency program                             | <input type="radio"/> | <input type="radio"/>      | <input type="radio"/> | <input type="radio"/> | <input type="radio"/> |
| Community of fellow 3 YPP students                          | <input type="radio"/> | <input type="radio"/>      | <input type="radio"/> | <input type="radio"/> | <input type="radio"/> |
| Any other aspect of 3 YPP ( please describe and then rate): | <input type="radio"/> | <input type="radio"/>      | <input type="radio"/> | <input type="radio"/> | <input type="radio"/> |

Q60 Please give us a sense of your overall evaluation of the three-year pathway program -- what were the program's strengths and what were its weaknesses?

---

Cangiarella J, Eliasz K, Kalet A, Cohen E, Abramson S, Gillespie C. A preliminary evaluation of students' learning and performance outcomes in an accelerated 3-Year MD pathway program. *J Grad Med Educ.* 2022;14(1):99-107. doi:10.4300/JGME-D-21-00284.1

---

---

---

---

---

Q8 Would you have chosen a three-year pathway program if it had not included the financial benefit of reduced tuition ?

- Definitely NOT
- Probably NOT
- Maybe
- Probably YES
- DefinitelyYES

---

Q61 Would you have chosen a three-year pathway program if it had not included the benefit of a residency position ?

- Definitely NOT
  - Probably NOT
  - Maybe
  - Probably YES
  - DefinitelyYES
-

Cangiarella J, Eliasz K, Kalet A, Cohen E, Abramson S, Gillespie C. A preliminary evaluation of students' learning and performance outcomes in an accelerated 3-Year MD pathway program. *J Grad Med Educ.* 2022;14(1):99-107. doi:10.4300/JGME-D-21-00284.1

Q47 Please choose the best answer for the following questions.

|                                                                                                    | My skills were much worse | My skills were somewhat worse | About the same        | My skills were somewhat better | My skills were much better | Don't Know/Can't Estimate |
|----------------------------------------------------------------------------------------------------|---------------------------|-------------------------------|-----------------------|--------------------------------|----------------------------|---------------------------|
| How would you rate your skills in comparison to the other MS4 students on your sub-internships?    | <input type="radio"/>     | <input type="radio"/>         | <input type="radio"/> | <input type="radio"/>          | <input type="radio"/>      | <input type="radio"/>     |
| How would you rate your skill in comparison to other MS4 students on your critical care rotation ? | <input type="radio"/>     | <input type="radio"/>         | <input type="radio"/> | <input type="radio"/>          | <input type="radio"/>      | <input type="radio"/>     |

Q48 How prepared do you feel to begin your residency ?

- Not Prepared At All
- A Little Bit Prepared
- Somewhat Prepared
- Moderately Prepared
- Very Prepared

Cangiarella J, Elias K, Kalet A, Cohen E, Abramson S, Gillespie C. A preliminary evaluation of students' learning and performance outcomes in an accelerated 3-Year MD pathway program. *J Grad Med Educ.* 2022;14(1):99-107. doi:10.4300/JGME-D-21-00284.1

Q62 Please tell us in what ways you feel prepared and in what ways you don't feel prepared:

---

---

---

---

---

---

Q75 We have or will be reaching our more formally to ask for your consent to check back in with you periodically (as we do with all alumni but perhaps a bit more frequently with graduates of the three-year pathway program!) and wanted to make sure we have good contact information so that we can reach out to you! Please provide us with the best personal email for you and your cell phone number if comfortable (we'd send a text message). For those of you continuing on in NYU Residency Programs, we will know how to find you but prefer to use your personal contact info if at all possible. (NB: This information is not stored with your responses to this survey).

You can always choose not to respond when we reach out and we promise not to hound you!

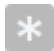

Q76 Personal email (the one you are mostly likely to keep):

---

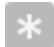

Q77 Cell phone number:

---



Cangiarella J, Eliasz K, Kalet A, Cohen E, Abramson S, Gillespie C. A preliminary evaluation of students' learning and performance outcomes in an accelerated 3-Year MD pathway program. *J Grad Med Educ.* 2022;14(1):99-107. doi:10.4300/JGME-D-21-00284.1

Q10 What were your biggest concerns about participating in the three-year pathway program ? To what degree were those concerns realized or not realized?

---

---

---

---

---

Q11 How satisfied were you with each of the following:

|                         | Not At All Satisfied  | Only a Little Satisfied | Somewhat Satisfied    | Very Satisfied        |
|-------------------------|-----------------------|-------------------------|-----------------------|-----------------------|
| Overall Advising        | <input type="radio"/> | <input type="radio"/>   | <input type="radio"/> | <input type="radio"/> |
| Violet Society Advising | <input type="radio"/> | <input type="radio"/>   | <input type="radio"/> | <input type="radio"/> |
| 3-Year Pathway Advisor  | <input type="radio"/> | <input type="radio"/>   | <input type="radio"/> | <input type="radio"/> |
| Departmental Advising   | <input type="radio"/> | <input type="radio"/>   | <input type="radio"/> | <input type="radio"/> |

Q19 How many times did you meet with individually your Violet Society Advisor?

- 1-2 times a year
- 3-4 times a year
- More than 4 times a year

Cangiarella J, Elias K, Kalet A, Cohen E, Abramson S, Gillespie C. A preliminary evaluation of students' learning and performance outcomes in an accelerated 3-Year MD pathway program. *J Grad Med Educ.* 2022;14(1):99-107. doi:10.4300/JGME-D-21-00284.1

Q20 How many times did you meet individually with your three-year advisor ?

- 1-2 times a year
  - 3-4 times a year
  - More than 4 times a year
- 

Q21 How many times did you meet individually with your departmental (residency program) advisor ?

- 1-2 times a year
  - 3-4 times a year
  - More than 4 times a year
- 

Q65 In general, how helpful did you find the advising you received as part of the three-year pathway program -- what worked and what could be improved?

---

---

---

---

---

Q24 Please describe how you interacted with your residency program during medical school, including which aspects were useful and what could have been improved/enhanced or was missing from those interactions (if applicable):

---

---

---

Cangiarella J, Eliasz K, Kalet A, Cohen E, Abramson S, Gillespie C. A preliminary evaluation of students' learning and performance outcomes in an accelerated 3-Year MD pathway program. *J Grad Med Educ.* 2022;14(1):99-107. doi:10.4300/JGME-D-21-00284.1

---

---

Q51 Did you participate in research within your department ?

No

Yes

---

*Display This Question:*

*If Did you participate in research within your department ? = Yes*

Q52 If you participated in research did you present your findings at a meeting ?

No

Yes

---

*Display This Question:*

*If If you participated in research did you present your findings at a meeting ? = Yes*

Q53 If yes, include name and date of the meeting.

---

---

---

---

---

---

*Display This Question:*

*If If you participated in research did you present your findings at a meeting ? = Yes*

Cangiarella J, Elias K, Kalet A, Cohen E, Abramson S, Gillespie C. A preliminary evaluation of students' learning and performance outcomes in an accelerated 3-Year MD pathway program. *J Grad Med Educ.* 2022;14(1):99-107. doi:10.4300/JGME-D-21-00284.1

Q54 Did you publish your results ?

No

Yes

---

*Display This Question:*

*If Did you publish your results ? = Yes*

Q55 If yes, please include citation.

---

---

---

---

---

---

Q31 Did you feel that you had enough preparation time for the Step 1 ?

No

Yes

---

Cangiarella J, Elias K, Kalet A, Cohen E, Abramson S, Gillespie C. A preliminary evaluation of students' learning and performance outcomes in an accelerated 3-Year MD pathway program. *J Grad Med Educ.* 2022;14(1):99-107. doi:10.4300/JGME-D-21-00284.1

Q56 How many weeks did you study for Step 1 ?

- Less than 4 weeks
  - 4 weeks
  - 5 weeks
  - 6 weeks
  - More than 6 weeks
- 

Q66 When did you take Step 1?

- MS2 (Please tell us which month below)  
\_\_\_\_\_
  - MS3 (Please tell us which month below)  
\_\_\_\_\_
- 

Q69 How did you study for USMLE Step 1? Please choose the answer below that best describes how hard you studied.

- I studied less than I would have if I wasn't already matched
  - I studied just as much as I would have if I wasn't already matched
  - Other - PLEASE EXPLAIN: \_\_\_\_\_
- 

Q32 Did you feel that you had enough preparation time for the Step 2 CK ?

- No
  - Yes
-

Cangiarella J, Elias K, Kalet A, Cohen E, Abramson S, Gillespie C. A preliminary evaluation of students' learning and performance outcomes in an accelerated 3-Year MD pathway program. *J Grad Med Educ.* 2022;14(1):99-107. doi:10.4300/JGME-D-21-00284.1

Q67 When did you take Step 2 CK?

MS2 - Please tell us which month:

\_\_\_\_\_

MS3 - Please tell us which month below:

\_\_\_\_\_

-----

Q33 Did you feel that you had enough preparation time for the Step 2 CS ?

No

Yes

-----

Q70 When did you take Step 2 CS?

MS2 (Please tell us which month below)

\_\_\_\_\_

MS3 (Please tell us which month below)

\_\_\_\_\_

-----

Q34 Do you think you studied more, less or about the same as your classmates for the board examinations ?

More

About the same

Less

-----

Cangiarella J, Elias K, Kalet A, Cohen E, Abramson S, Gillespie C. A preliminary evaluation of students' learning and performance outcomes in an accelerated 3-Year MD pathway program. *J Grad Med Educ.* 2022;14(1):99-107. doi:10.4300/JGME-D-21-00284.1

Q45 What opportunities did you feel you had by being part of the three year pathway that students in the four year pathway did not have ?

---

---

---

---

---

---

Q46 Were there other opportunities you wish you had that you couldn't take advantage of because of being in the 3 YPP?

---

---

---

---

---

---

**Q47 Did you opt-out of the three-year program or change residency?**

- Yes, I opted out
- Yes, I changed residency
- I stayed in the program and did not change residency

*Skip To: Q50 If Did you opt-out of the three-year program or change residency? = I stayed in the program and did not change residency*

*Display This Question:*

*If Did you opt-out of the three-year program or change residency? = Yes, I opted out*

Cangiarella J, Eliasz K, Kalet A, Cohen E, Abramson S, Gillespie C. A preliminary evaluation of students' learning and performance outcomes in an accelerated 3-Year MD pathway program. *J Grad Med Educ.* 2022;14(1):99-107. doi:10.4300/JGME-D-21-00284.1

Q71 Please tell us about why you opted out. How are you happy with that decision? How did you make that decision? Is there anything that would have changed your mind?

---

---

---

---

---

*Display This Question:*

*If Did you opt-out of the three-year program or change residency? = Yes, I changed residency*

Q72 Please tell us about why you changed residency. How are you happy with that decision? How did you make that decision?

---

---

---

---

---

Q48 When did you realize you wanted a different career path ?

- First year
- Second year
- Third year



Cangiarella J, Eliasz K, Kalet A, Cohen E, Abramson S, Gillespie C. A preliminary evaluation of students' learning and performance outcomes in an accelerated 3-Year MD pathway program. *J Grad Med Educ.* 2022;14(1):99-107. doi:10.4300/JGME-D-21-00284.1

Q49 Did you feel advisors were supportive of this decision ?

- Not at all Supportive
  - Somewhat Supportive
  - Very Supportive
- 

Q74 Please share any feedback on how advisors supported your decision:

---

---

---

---

---

Q79 Now that you're about to graduate, would you do it all over again? (please select choice that best reflects your feelings)

- Yes, definitely would do the 3 Year Pathway Program again
  - I probably would do the 3 Year Pathway Program again
  - I'm not sure if I would do again
  - I don't think I would do it again
- 

Q80 Overall, how do you think your experience of the 3 Year Pathway Program compares to the experience of students in the traditional 4 Year Pathway?

---

---

---

Cangiarella J, Elias K, Kalet A, Cohen E, Abramson S, Gillespie C. A preliminary evaluation of students' learning and performance outcomes in an accelerated 3-Year MD pathway program. *J Grad Med Educ.* 2022;14(1):99-107. doi:10.4300/JGME-D-21-00284.1

---

---

---

Q50 Anything else you want us to know ?

---

---

---

---

---

End of Block: Default Question Block

---

## **2019 Residency Program Directors' Evaluation of NYU Graduates (Class of 2018)**

---

### **Start of Block: Specific Area of Competence**

Q14 Thank you so much for taking the time to assess our graduate as an intern in your program. We truly appreciate your time and thoughtfulness and value the insight your perspective provides on our medical school.

Mel Rosenfeld and Vicky Harnik,  
NYU School of Medicine

---

Cangiarella J, Elias K, Kalet A, Cohen E, Abramson S, Gillespie C. A preliminary evaluation of students' learning and performance outcomes in an accelerated 3-Year MD pathway program. *J Grad Med Educ*. 2022;14(1):99-107. doi:10.4300/JGME-D-21-00284.1

Q3 Please rate the specific competence of **Field/EmbeddedDataC** compared to other 1st Year residents:

Cangiarella J, Eliasz K, Kalet A, Cohen E, Abramson S, Gillespie C. A preliminary evaluation of students' learning and performance outcomes in an accelerated 3-Year MD pathway program. *J Grad Med Educ.* 2022;14(1):99-107. doi:10.4300/JGME-D-21-00284.1

|                                                            | <b>Inadequate<br/>(Well Below<br/>Other 1st Year<br/>Residents)</b> | <b>Marginal<br/>(Slightly Below<br/>Average for 1st<br/>Year<br/>Residents)</b> | <b>Satisfactory<br/>(Average for<br/>1st Year<br/>Residents)</b> | <b>Outstanding<br/>(Above<br/>Average for 1st<br/>Year<br/>Residents)</b> |
|------------------------------------------------------------|---------------------------------------------------------------------|---------------------------------------------------------------------------------|------------------------------------------------------------------|---------------------------------------------------------------------------|
| Medical knowledge (breadth and depth of fund of knowledge) | <input type="radio"/>                                               | <input type="radio"/>                                                           | <input type="radio"/>                                            | <input type="radio"/>                                                     |
| Data collection (history taking & physical examination)    | <input type="radio"/>                                               | <input type="radio"/>                                                           | <input type="radio"/>                                            | <input type="radio"/>                                                     |
| Data interpretation & analysis                             | <input type="radio"/>                                               | <input type="radio"/>                                                           | <input type="radio"/>                                            | <input type="radio"/>                                                     |
| Critical thinking                                          | <input type="radio"/>                                               | <input type="radio"/>                                                           | <input type="radio"/>                                            | <input type="radio"/>                                                     |
| Use of the literature on rounds                            | <input type="radio"/>                                               | <input type="radio"/>                                                           | <input type="radio"/>                                            | <input type="radio"/>                                                     |
| Use of the literature for clinical decision making         | <input type="radio"/>                                               | <input type="radio"/>                                                           | <input type="radio"/>                                            | <input type="radio"/>                                                     |
| Interpersonal and communication skills                     | <input type="radio"/>                                               | <input type="radio"/>                                                           | <input type="radio"/>                                            | <input type="radio"/>                                                     |
| Technical, procedural skills                               | <input type="radio"/>                                               | <input type="radio"/>                                                           | <input type="radio"/>                                            | <input type="radio"/>                                                     |
| Clinical judgment                                          | <input type="radio"/>                                               | <input type="radio"/>                                                           | <input type="radio"/>                                            | <input type="radio"/>                                                     |
| Clinical decision-making                                   | <input type="radio"/>                                               | <input type="radio"/>                                                           | <input type="radio"/>                                            | <input type="radio"/>                                                     |
| Teaching ability                                           | <input type="radio"/>                                               | <input type="radio"/>                                                           | <input type="radio"/>                                            | <input type="radio"/>                                                     |
| Industriousness                                            | <input type="radio"/>                                               | <input type="radio"/>                                                           | <input type="radio"/>                                            | <input type="radio"/>                                                     |

Cangiarella J, Elias K, Kalet A, Cohen E, Abramson S, Gillespie C. A preliminary evaluation of students' learning and performance outcomes in an accelerated 3-Year MD pathway program. *J Grad Med Educ.* 2022;14(1):99-107. doi:10.4300/JGME-D-21-00284.1

|                                                    |                       |                       |                       |                       |
|----------------------------------------------------|-----------------------|-----------------------|-----------------------|-----------------------|
| Flexibility/Openness                               | <input type="radio"/> | <input type="radio"/> | <input type="radio"/> | <input type="radio"/> |
| Professionalism                                    | <input type="radio"/> | <input type="radio"/> | <input type="radio"/> | <input type="radio"/> |
| Ability to work within a multidisciplinary team    | <input type="radio"/> | <input type="radio"/> | <input type="radio"/> | <input type="radio"/> |
| Ability for self-directed learning and improvement | <input type="radio"/> | <input type="radio"/> | <input type="radio"/> | <input type="radio"/> |
| Cultural competence                                | <input type="radio"/> | <input type="radio"/> | <input type="radio"/> | <input type="radio"/> |

---

Q12 Please rate the degree of supervision **#{e://Field/EmbeddedDataC}** needed, when he or she first started, to perform each of the Core Entrustable Professional Activities for Entering

Cangiarella J, Elias K, Kalet A, Cohen E, Abramson S, Gillespie C. A preliminary evaluation of students' learning and performance outcomes in an accelerated 3-Year MD pathway program. *J Grad Med Educ*. 2022;14(1):99-107. doi:10.4300/JGME-D-21-00284.1

Residency (that is, what did you "entrust" this intern to be able to do at the very start of your residency program):

Cangiarella J, Elias K, Kalet A, Cohen E, Abramson S, Gillespie C. A preliminary evaluation of students' learning and performance outcomes in an accelerated 3-Year MD pathway program. *J Grad Med Educ.* 2022;14(1):99-107. doi:10.4300/JGME-D-21-00284.1

|                                                                                                                                                        | Could NOT Perform Even with Direct Supervision | Could Perform with Direct Supervision | Could Perform with Indirect Supervision | Could Perform Independently (No Supervision Needed) | I Cannot Judge (or is Not Applicable) |
|--------------------------------------------------------------------------------------------------------------------------------------------------------|------------------------------------------------|---------------------------------------|-----------------------------------------|-----------------------------------------------------|---------------------------------------|
| EPA 1: Gather a history and perform a physical examination that is complete or focused, based on the clinical situation and specific patient encounter | <input type="radio"/>                          | <input type="radio"/>                 | <input type="radio"/>                   | <input type="radio"/>                               | <input type="radio"/>                 |
| EPA 2: Develop a prioritized differential diagnosis and select a working diagnosis following a patient encounter                                       | <input type="radio"/>                          | <input type="radio"/>                 | <input type="radio"/>                   | <input type="radio"/>                               | <input type="radio"/>                 |
| EPA 3: Recommend, order, and interpret common diagnostic and screening tests                                                                           | <input type="radio"/>                          | <input type="radio"/>                 | <input type="radio"/>                   | <input type="radio"/>                               | <input type="radio"/>                 |
| EPA 4: Enter and discuss safe and indicated patient orders/prescriptions                                                                               | <input type="radio"/>                          | <input type="radio"/>                 | <input type="radio"/>                   | <input type="radio"/>                               | <input type="radio"/>                 |
| EPA 5: Provide accurate, focused, and context-specific documentation of a clinical encounter in written or electronic format                           | <input type="radio"/>                          | <input type="radio"/>                 | <input type="radio"/>                   | <input type="radio"/>                               | <input type="radio"/>                 |
| EPA 6: Provide an oral presentation/summary of a patient encounter                                                                                     | <input type="radio"/>                          | <input type="radio"/>                 | <input type="radio"/>                   | <input type="radio"/>                               | <input type="radio"/>                 |
| EPA 7: Form clinical questions and retrieve high-quality evidence to advance patient care                                                              | <input type="radio"/>                          | <input type="radio"/>                 | <input type="radio"/>                   | <input type="radio"/>                               | <input type="radio"/>                 |



Cangiarella J, Elias K, Kalet A, Cohen E, Abramson S, Gillespie C. A preliminary evaluation of students' learning and performance outcomes in an accelerated 3-Year MD pathway program. *J Grad Med Educ.* 2022;14(1):99-107. doi:10.4300/JGME-D-21-00284.1

|                                                                                                                     |                       |                       |                       |                       |                       |
|---------------------------------------------------------------------------------------------------------------------|-----------------------|-----------------------|-----------------------|-----------------------|-----------------------|
| EPA 8: Give or receive a patient handover to transition care responsibility to another health care provider or team | <input type="radio"/> |
| EPA 9: Participate as a contributing and integrated member of an interprofessional team                             | <input type="radio"/> |
| EPA 10: Recognize a patient requiring urgent or emergent care, initiate evaluation and treatment, and seek help     | <input type="radio"/> |
| EPA 11: Obtain informed consent for tests and/or procedure that the Day 1 Intern is expected to perform or order    | <input type="radio"/> |
| EPA 12: Perform procedures of a general physician (e.g., basic CPR, bag and mask ventilation, venipuncture, IV)     | <input type="radio"/> |
| EPA 13: Identify system failures and contribute to a culture of safety and improvement                              | <input type="radio"/> |

---

Q13 Please comment on any of the above that require more explanation or more generally about the "entrustability" of this intern:

---

Cangiarella J, Elias K, Kalet A, Cohen E, Abramson S, Gillespie C. A preliminary evaluation of students' learning and performance outcomes in an accelerated 3-Year MD pathway program. *J Grad Med Educ.* 2022;14(1):99-107. doi:10.4300/JGME-D-21-00284.1

---

---

---

---

End of Block: Specific Area of Competence

---

Start of Block: Overall

Q4 Based on your experience with interns, how would you rate the OVERALL performance of **#{e://Field/EmbeddedDataC}**?

|                                               | Inadequate<br>(Well Below<br>Other 1st Year<br>Residents) | Marginal<br>(Slightly Below<br>Average for 1st<br>Year Residents) | Satisfactory<br>(Average for 1st<br>Year Residents) | Outstanding<br>(Above Average<br>for 1st Year<br>Residents) |
|-----------------------------------------------|-----------------------------------------------------------|-------------------------------------------------------------------|-----------------------------------------------------|-------------------------------------------------------------|
| OVERALL<br>performance of<br>this individual? | <input type="radio"/>                                     | <input type="radio"/>                                             | <input type="radio"/>                               | <input type="radio"/>                                       |

Q6 Knowing what you now know about **#{e://Field/EmbeddedDataC}**, would you select him/her again?

- Definitely NOT (Would NOT Select)
  - Probably Would NOT Select
  - Not Sure
  - Probably WOULD Select Again
  - Definitely WOULD Select Again
-

Cangiarella J, Eliasz K, Kalet A, Cohen E, Abramson S, Gillespie C. A preliminary evaluation of students' learning and performance outcomes in an accelerated 3-Year MD pathway program. *J Grad Med Educ.* 2022;14(1):99-107. doi:10.4300/JGME-D-21-00284.1

Q8 Please explain your assessment of [this resident's particular strengths or weaknesses](#) and describe **this resident's particular strengths or weaknesses**:

---

---

---

---

---

---

Q9 Are there any areas in which you suspect that **NYU graduates in general** may need more education or training? If so, please describe:

---

---

---

---

---

---

Q17 Lastly, any feedback on NYU's Dean's Letter (MSPE)?

---

---

Q10 Thanks so much for taking the time to help us evaluate our Medical School's effectiveness in preparing residents!

End of Block: Overall

---

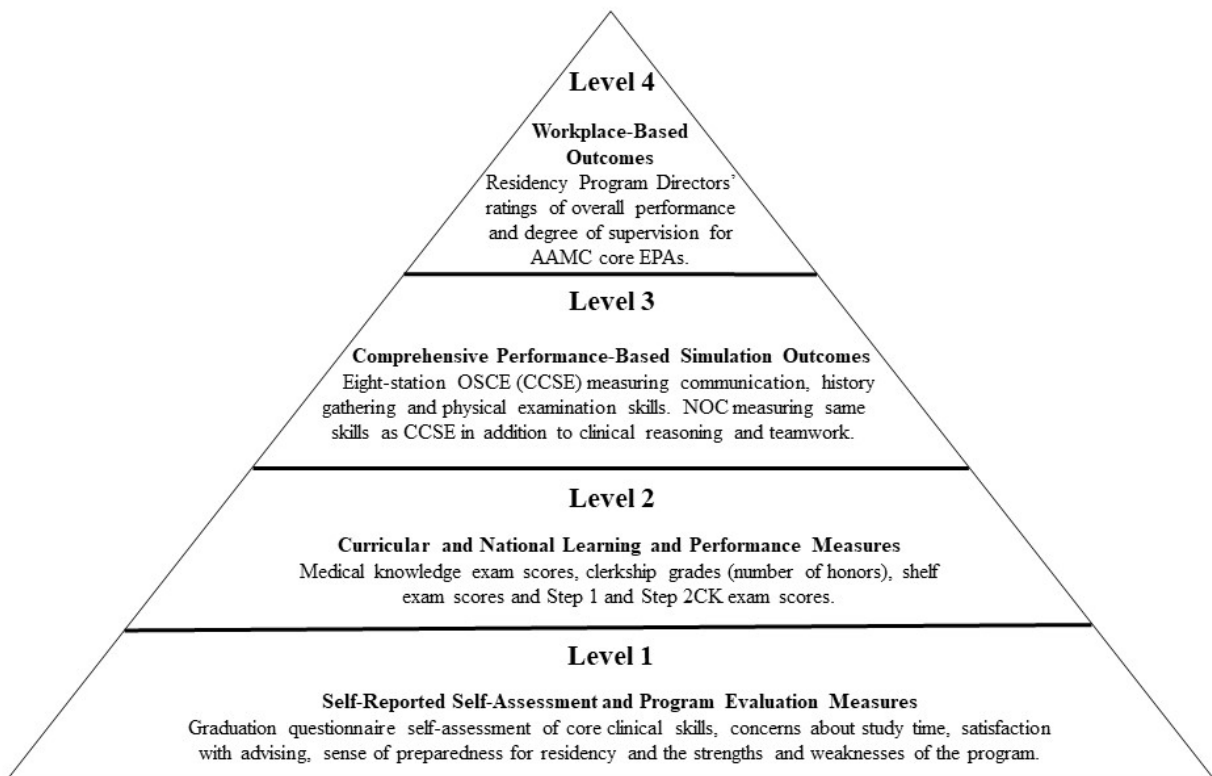

**Figure 1. Outcomes being assessed using the Kirkpatrick Evaluation Model**
